# Supplementary material for: Modification of the Creator recombination system for proteomics applications – improved expression by addition of splice sites
Source: PubMed Central journal article supplement (PMC1421398; doi:10.1186/1472-6750-6-13), 2006-03-06
Supplement: 1472-6750-6-13-S3.pdf [file 1472-6750-6-13-S3.pdf]

**Additional Table 3a) Construction of Expression Vectors**

| <b>Vector ID</b> | <b>Source of Insert</b>                             | <b>Donor Vector</b>                  | <b>Acceptor Vector</b> | <b>Name</b>                 |
|------------------|-----------------------------------------------------|--------------------------------------|------------------------|-----------------------------|
| V310             | I233 = O519 & O520 – PCR with BC012488 as template  | V50 = I233 + Ascl/Pacl-digested V7   | V179                   | 5' Triple-Flag ArhGEF1      |
| V311             | I233 = O519 & O520 – PCR with BC012488 as template  | V50 = I233 + Ascl/Pacl-digested V7   | V181                   | 3'Triple-Flag ArhGEF1       |
| V312             | I233 = O519 & O520 – PCR with BC012488 as template  | V91 = I233 + Ascl/Pacl-digested V37  | V180                   | SPLICE Triple-Flag ArhGEF1  |
| V313             | I234 = O541 & O547 – PCR with BC003259 as template  | V41 = I234 + Ascl/Pacl-digested V7   | V179                   | 5' Triple-Flag Nadrin       |
| V314             | I234 = O541 & O547 – PCR with BC003259 as template  | V41 = I234 + Ascl/Pacl-digested V7   | V181                   | 3' Triple-Flag Nadrin       |
| V315             | I234 = O541 & O547 – PCR with BC003259 as template  | V222 = I234 + Ascl/Pacl-digested V37 | V180                   | SPLICE Triple-Flag Nadrin   |
| V316             | I235 = O533 & O535 – PCR with BC006107 as template  | V47 = I235 + Ascl/Pacl-digested V7   | V179                   | 5' Triple-Flag ArhGAP9      |
| V317             | I235 = O533 & O535 – PCR with BC006107 as template  | V47 = I235 + Ascl/Pacl-digested V7   | V181                   | 3' Triple-Flag ArhGAP9      |
| V318             | I235 = O533 & O535 – PCR with BC006107 as template  | V100 = I235 + Ascl/Pacl-digested V37 | V180                   | SPLICE Triple-Flag ArhGAP9  |
| V319             | I231 = O714 & O720 – PCR with AB007884 as template  | V117 = I231 +Ascl/Pacl-digested V7   | V179                   | 5' Triple-Flag ArhGEF9      |
| V320             | I231 = O714 & O720 – PCR with AB007884 as template  | V117 = I231 +Ascl/Pacl-digested V7   | V181                   | 3' Triple-Flag ArhGEF9      |
| V321             | I231 = O714 & O720 – PCR with AB007884 as template  | V210 = I231 +Ascl/Pacl-digested V37  | V180                   | SPLICE Triple-Flag ArhGEF9  |
| V322             | I230 = O588 & O594 – PCR with BC0027070 as template | V54 = I230 +Ascl/Pacl-digested V7    | V179                   | 5' Triple-Flag ArhGap24     |
| V323             | I230 = O588 & O594 – PCR with BC0027070 as template | V54 = I230 +Ascl/Pacl-digested V7    | V181                   | 3'Triple-Flag ArhGap24      |
| V324             | I230 = O588 & O594 – PCR with BC0027070 as template | V97 = I230 + Ascl/Pacl-digested V37  | V180                   | SPLICE Triple-Flag ArhGap24 |
| V325             | I232 = O589 & O595 – PCR with BC027830 as template  | V48 = I232 + Ascl/Pacl-digested V7   | V179                   | 5' Triple-Flag StarD13      |
| V326             | I232 = O589 & O595 – PCR with BC027830 as template  | V48 = I232 + Ascl/Pacl-digested V7   | V181                   | 3' Triple-Flag StarD13      |
| V327             | I232 = O589 & O595 – PCR with BC027830 as template  | V103 = I232 + Ascl/Pacl-digested V37 | V180                   | SPLICE Triple-Flag StarD13  |

|       |                                                     |                                                           |      |                                    |
|-------|-----------------------------------------------------|-----------------------------------------------------------|------|------------------------------------|
| V430  | I233 = O519 & O520 – PCR with BC012488 as template  | V91 = I233 + Ascl/Pacl-digested V37                       | V179 | 5' SA Triple-Flag ArhGEF1          |
| V433  | I231 = O714 & O720 – PCR with AB007884 as template  | V210 = I231 +Ascl/Pacl-digested V37                       | V179 | 5' SA Triple-Flag ArhGEF9          |
| V436  | I233 = O519 & O520 – PCR with BC012488 as template  | V91 = I233 + Ascl/Pacl-digested V37                       | V181 | 3' SA Triple-Flag ArhGEF1          |
| V439  | I231 = O714 & O720 – PCR with AB007884 as template  | V210 = I231 +Ascl/Pacl-digested V37                       | V181 | 3' SA Triple-Flag ArhGEF9          |
| V626  | I125 = O95 & O96 – PCR with BC013645 as template    | V592 = I125 + Ascl/Pacl-digested V308                     | V516 | 5' Double-Myc WWP2                 |
| V627  | I127 = O103 & O104 – PCR with AB002320 as template  | V593 = I127 + Ascl/Pacl-digested V308                     | V516 | 5' Double-Myc Bull                 |
| V628  | I125 = O95 & O96 – PCR with BC013645 as template    | V594 = I125 + Ascl/Pacl-digested V309                     | V517 | SPLICE double-Myc WWP2             |
| V629  | I127 = O103 & O104 – PCR with AB002320 as template  | V595 = I127 + Ascl/Pacl-digested V309                     | V517 | SPLICE double-Myc Bull             |
| V630  | I125 = O95 & O96 – PCR with BC013645 as template    | V592 = I125 + Ascl/Pacl-digested V308                     | V518 | 3' Double-Myc WWP2                 |
| V631  | I127 = O103 & O104 – PCR with AB002320 as template  | V593 = I127 + Ascl/Pacl-digested V308                     | V518 | 3' Double-Myc Bull                 |
| V1110 | I51 = O301 & O277 – PCR with AB028994 as template   | V690 = I51 + Ascl/Pacl-digested V308                      | V957 | 3' Angiotonin N-terminus-ECFP-mito |
| V1113 | I51 = O301 & O277 – PCR with AB028994 as template   | V690 = I51 + Ascl/Pacl-digested V308                      | V956 | 3' Angiotonin N-terminus-ECFP-mito |
| V1840 | I485 = O926 & O927 – PCR with AB007884 as template  | I485 inserted into topo-activated pCMV-Triple Flag vector | N/A  | Topo Triple-Flag ArhGEF9           |
| V1841 | I486 = O928 & O929 – PCR with BC0027070 as template | I486 inserted into topo-activated pCMV-Triple Flag vector | N/A  | Topo Triple-Flag ArhGap24          |
| V1842 | I487 = O930 & O931 – PCR with BC003259 as template  | I487 inserted into topo-activated pCMV-Triple Flag vector | N/A  | Topo Triple-Flag Nadrin            |
| V1843 | I488 = O934 & O935 – PCR with BC027830 as template  | I488 inserted into topo-activated pCMV-Triple Flag vector | N/A  | Topo Triple-Flag ArhGEF1           |
| V1844 | I489 = O936 & O937 – PCR with BC012488 as template  | I489 inserted into topo-activated pCMV-Triple Flag vector | N/A  | Topo Triple-Flag StarD13           |
| V1845 | I490 = O932 & O933 – PCR with BC006107 as template  | I490 inserted into topo-activated pCMV-Triple Flag vector | N/A  | Topo Triple-Flag ArhGAP9           |

Additional Table 3b) Construction of Expression Vectors used in Additional File 5

| Vector ID | Source of Insert | Donor Vector Backbone | Acceptor Vector | Name                         |
|-----------|------------------|-----------------------|-----------------|------------------------------|
| V86       | BC004845 ORF     | V7                    | V26             | 3' Flag-Oligophrenin 1       |
| V88       | BC027070 ORF     | V7                    | V26             | 3' Flag-ArhGAP24             |
| V144      | BC013361 ORF     | V37                   | V143            | SPLICE HA-Vav1               |
| V145      | BC012262 ORF     | V37                   | V143            | SPLICE HA-ArhGEF3            |
| V146      | BC004845 ORF     | V37                   | V143            | SPLICE HA-Oligophrenin 1     |
| V147      | BC034881 ORF     | V37                   | V143            | SPLICE HA-ArhGAP15           |
| V331      | AB007884 ORF     | V37                   | V207            | 5' RETRO Triple-Flag ArhGEF9 |
| V468      | BC004247 ORF     | V7                    | V25             | 5' Flag-Racl                 |
| V469      | NM_002872 ORF    | V7                    | V25             | 5' Flag-Rac2                 |
| V470      | NM_005052 ORF    | V7                    | V25             | 5' Flag-Rac3                 |
| V471      | BC016155 ORF     | V7                    | V25             | 5' Flag RheB2                |
| V472      | BC018096 ORF     | V7                    | V25             | 5' Flag Rho7                 |
| V473      | BC005362 ORF     | V7                    | V25             | 5' Flag Rhol                 |
| V525      | BC004247 ORF     | V309                  | V33             | SPLICE Flag Racl             |
| V526      | NM_005052 ORF    | V309                  | V33             | SPLICE Flag Rac3             |
| V527      | BC016155 ORF     | V309                  | V33             | SPLICE Flag RheB2            |
| V528      | BC018096 ORF     | V309                  | V33             | SPLICE Flag Rho7             |
| V529      | BC005362 ORF     | V309                  | V33             | SPLICE Flag Rhol             |
| V936      | BC043500 SH2     | V624                  | V622            | GST-loxP-Crkl SH2            |
| V939      | BC014435 SH2     | V624                  | V622            | GST-loxP-Hck SH2             |
| V941      | BC013200 SH2     | V624                  | V622            | GST-loxP-Lck SH2             |
| V1461     | BC014435 SH2     | n/a                   | pGEX 2TK        | GST-Hck SH2                  |
| V1462     | BC013200 SH2     | n/a                   | pGEX 2TK        | GST-Lck SH2                  |
| V1463     | BC043500 SH2     | n/a                   | pGEX 2TK        | GST-Crkl SH2                 |
| V1575     | BC063035 SH2     | n/a                   | pPRO Ex HTb     | His-Grap SH2                 |
| V1576     | BC025692 SH2     | n/a                   | pPRO Ex HTb     | His-Grap2 SH2                |
| V1577     | BC000631 SH2     | n/a                   | pPRO Ex HTb     | His-Grb2 SH2                 |
| V1671     | BC063035 SH2     | V677                  | V1579           | His-loxP-Grap SH2            |
| V1672     | BC025692 SH2     | V677                  | V1579           | His-loxP-Grap2 SH2           |
| V1673     | BC000631 SH2     | V677                  | V1579           | His-loxP-Grb2 SH2            |
| V1674     | BC006535 SH2     | V677                  | V1579           | His-loxP Grb7 SH2            |

|       |               |      |       |                    |
|-------|---------------|------|-------|--------------------|
| V1675 | D86962 SH2    | V677 | V1579 | His-loxP-Grb10 SH2 |
| V1676 | BC053559 SH2  | V677 | V1579 | His-loxP-Grb14 SH2 |
| V1800 | NM_005902 ORF | V308 | V1662 | 5'-RFP-Smad3       |
| V1854 | BC000479 ORF  | V308 | V1662 | 5'-RFP-Rab5A       |
| V1856 | BC001267 ORF  | V308 | V1662 | 5'-RFP-Akt1        |
