# Supplementary material for: Modification of the Creator recombination system for proteomics applications – improved expression by addition of splice sites
Source: PubMed Central journal article supplement (PMC1421398; doi:10.1186/1472-6750-6-13), 2006-03-06
Supplement: 1472-6750-6-13-S4.pdf [file 1472-6750-6-13-S4.pdf]

**Additional Table 4) Oligonucleotides Sequences**

| <b>Oligo ID</b> | <b>Oligo Sequence</b>                                                                          |
|-----------------|------------------------------------------------------------------------------------------------|
| O1              | CATTAGATCTATAACTTCGTATAGCATACATTATACGAAGTTA TGGCGCGCCGTC GACGGTACCGGACATATGCCCGGGAAT           |
| O2              | ATCCCTAGGAACTTACCTGGTTAATTAAGGCCCGCGCGC AAACGAATGGTC T                                         |
| O3              | CGCGAGGGTTTTCTTGACAATATCATACTTATCCTGTCCCTTTTTTTTCCCCAGGGG                                      |
| O4              | CGCGCCCCTGGGGAAAAAAAAGGGACAGGATAAGTATGATATTGTCAAGGAAACCCT                                      |
| O5              | CTAGCCACCATGGACTACAAGGACGACGACGACAAGCA                                                         |
| O6              | AGCTTGCTTGTGTCGTCGTCGTCCTTGTAGTCCATGGTGG                                                       |
| O7              | TCCGGACTCAGATCTTGACCTCTCAAAGCGGGCATG                                                           |
| O8              | AAGTTATCGAAGCTTAGCGTTGACCTTGTACCCT                                                             |
| O9              | CTAGCCACCATGGACTACAAGGACGACGACGACAAGGTAAGTA                                                    |
| O10             | GATCTACTTACCTTGTGTCGTCGTCCTTGTAGTCCATGGTGG                                                     |
| O13             | CTAGCCACC ATG TAC CCA TAC GAC GTG CCA GAC TAC GCC CAG GTAAGTA                                  |
| O14             | GATCTACTTACCTGGGCGTAGTCTGGCACGTCGTATGGGTACATGGTGG                                              |
| O15             | CCG GTG GAC TAC AAG GAC GAC GAC GAC AAG TAA T                                                  |
| O16             | CTAGATTACTTGTGTCGTCGTCGTCCTTGTAGTCCA                                                           |
| O17             | CCG GTG TAC CCA TAC GAC GTG CCA GAC TAC GCC TAA T                                              |
| O18             | CTAGATTAGGCGTAGTCTGGCACGTCGTATGGGTACA                                                          |
| O28             | CTAGCCACCATGGACTACAAGGACCACGACGGCGACTACAAGGACCACGACATCGACTACAAGGACGACGACGACAAGCA               |
| O29             | AGCTTGCTTGTGTCGTCGTCGTCCTTGTAGTCGATGTCGTGGTCCTTGTAGTCGCCGTCGTGGTCCTTGTAGTCCATGGTGG             |
| O30             | CTAGCCACCATGGACTACAAGGACCACGACGGCGACTACAAGGACCACGACATCGACTACAAGGACGACGACGACAAGGTAAGTA          |
| O31             | GATCTACTTACCTTGTGTCGTCGTCGTCCTTGTAGTCGATGTCGTGGTCCTTGTAGTCGCCGTCGTGGTCCTTGTAGTCCATGGTGG        |
| O32             | CCGGTGGACTACAAGGACCACGACGGCGACTACAAGGACCACGACATCGACTACAAGGACGACGACGACAAGTAAT                   |
| O33             | CTAGATTACTTGTGTCGTCGTCGTCCTTGTAGTCGATGTCGTGGTCCTTGTAGTCGCCGTCGTGGTCCTTGTAGTCCA                 |
| O74             | TACGTCTCGAGCCACCATGGACTACAAGGACC                                                               |
| O75             | TACGTGTTAACACGTCAGGTGGCACTTTTCG                                                                |
| O78             | TCGAGGCGCGCCGGCGCCAATACGCAAAC                                                                  |
| O79             | GCCATTAATTAACGCCATTTCGCCATTCAGG                                                                |
| O82             | CTAGCCACCATGGAGCAGAAGCTGATCAGCGAGGAGGACCTGGGCGGCGAGCAGAAGCTGATCAGCGAGGAGGACCTGCA               |
| O83             | AGCTTGCAAGTCTCCTCGCTGATCAGCTTCTGCTCGCCGCCAGGTCTCCTCGCTGATCAGCTTCTGCTCCATGGTGG                  |
| O84             | CTAGCCACCATGGAGCAGAAGCTGATCAGCGAGGAGGACCTGGGCGGCGAGCAGAAGCTGATCAGCGAGGAGGACCTGGGCGGCCAGGTAAGTA |
| O85             | GATCTACTTACCTGGCCGCCAGGTCTCCTCGCTGATCAGCTTCTGCTCGCCGCCAGGTCTCCTCGCTGATCAGCTTCTGCTCCATGGTGG     |
| O86             | CCGGTGGAGCAGAAGCTGATCAGCGAGGAGGACCTGGGCGGCGAGCAGAAGCTGATCAGCGAGGAGGACCTGTAAT                   |
| O87             | CTAGATTACAGTCTCCTCGCTGATCAGCTTCTGCTCGCCGCCAGGTCTCCTCGCTGATCAGCTTCTGCTCCA                       |
| O95             | ATCGGGCGCGCCATGGCATCTGCCAGCTCTAGCCGGGCAGGA                                                     |
| O96             | ATCGTTAATTAACCTGTCCAAAGCCCTCGGTCTCCTCAAT                                                       |
| O103            | ATCGGGCGCGCCATGGCGTCTCCTTCTAGAACTCCCAGAGC                                                      |
| O104            | ATCGTTAATTAACCTCAAGTCCAAAGGTGCTGGTTTCCTCTAC                                                    |
| O107            | TACGGGATCCATAACTTCGTATAGCATACA                                                                 |

|      |                                                                                                                  |
|------|------------------------------------------------------------------------------------------------------------------|
| O108 | CGTCGAATTCACGTCAGGTGGCACTT                                                                                       |
| O109 | TGCGCATATGGATAACTTCGTATAGCATACA                                                                                  |
| O110 | CT AGC ATA ACT TCG TAT AGC ATA CAT TAT ACG AAG TTA TGG GGA TCC GTC GAC CCC GGG AAG CTT GAA TTC CAG GTA AGT TAG C |
| O111 | CT AGG CTA ACT TAC CTG GAA TTC AAG CTT CCC GGG GTC GAC GGA TCC CCA TAA CTT CGT ATA ATG TAT GCT ATA CGA AGT TAT G |
| O277 | CTA GGA ACT TAC CTG GTT AAT TAA TGA AAC GTT GGT GGG CTG                                                          |
| O301 | TTC CCC AGG GGC GCG CCA TGC CTC GGG CTC AGC CAT C                                                                |
| O374 | CGCGCCG GGAATTCAGC GGCCGCGGGA TCCGTCTGACT TAAT                                                                   |
| O375 | GGC CCTTAAGTCG CCGGCGCCCT AGGCAGCTGA AT                                                                          |
| O384 | TCT CCA TTT TGG CTT CCT TGG CTC CTG AAA GAT CC                                                                   |
| O385 | GGA TCT TTC AGG AGC CAA GGA AGC CAA AAT GGA GA                                                                   |
| O388 | GTACACCGGTGAGCAAGGGCGAGGAGCTG                                                                                    |
| O389 | GATCTCTAGATTACTTGTACAGCTCGTCTACGC                                                                                |
| O390 | GATCTGTACAAGAACTAATTGCTAAAAG                                                                                     |
| O391 | ATGACAATTGTTAATTATTTTTCTTAATTG                                                                                   |
| O484 | CTAG GCTAGC CCACC ATG GCC TCC TCC GAG GAC GTC ATC AAG                                                            |
| O485 | CTAG AAGCTT GG GCG CCG GTG GAG TGG CGG CCC TCG GC                                                                |
| O486 | CTAG ACCGGT G GCC TCC TCC GAG GAC GTC ATC AAG                                                                    |
| O487 | CTAG TCTAGA TTA GGC GCC GGT GGA GTG GCG GCC CTC GGC                                                              |
| O488 | CTAG TGTACA G GGC GCC GGT GGA GTG GCG GCC CTC GGC                                                                |
| O519 | AAG TTA TGG CGC GCC ATG GGA GAA GTC GCC G                                                                        |
| O520 | TAC CTG GTT AAT TAA TGA AAG GCC TGT CTG AG                                                                       |
| O533 | AAG TTA TGG CGC GCC ATG CTA TCC AGC CGG TG                                                                       |
| O535 | TAC CTG GTT AAT TAA GGG GAA GAG GCT GGT G                                                                        |
| O541 | AAG TTA TGG CGC GCC ATG AAG AAG CAA TTC AAC CG                                                                   |
| O547 | TAC CTG GTT AAT TAA TAC ATC AGT GAC GAT TCT GG                                                                   |
| O588 | AAG TTA TGG CGC GCC ATG ACA GCC AAT CAT GAG AG                                                                   |
| O589 | AAG TTA TGG CGC GCC ATG AGA CTT GAT GTG AAC TT                                                                   |
| O594 | TAC CTG GTT AAT TAA CTG GAT CCA GAT TGT GTT TC                                                                   |
| O595 | TAC CTG GTT AAT TAA GAT TTT TGT TTC TGG ACC CT                                                                   |
| O714 | AAG TTA TGG CGC GCC ATG ACG TTG CTG ATC ACT G                                                                    |
| O720 | TAC CTG GTT AAT TAA TTT TTT GAA GGG GGT TAA CC                                                                   |
| O926 | CACCATGACGTTGCTGATCACTG                                                                                          |
| O927 | GAATTCATCATTTTTTTGAAGGGGGTTAAC                                                                                   |
| O928 | CAC CAT GAC AGC CAA TCA TGA GAG                                                                                  |
| O929 | GAA TTC ATC ACT GGA TCC AGA TTG TG                                                                               |
| O930 | CAC CAT GAA GAA GCA ATT CAA CCG                                                                                  |
| O931 | GAA TTC ATC ATA CAT CAG TGA CGA TTC                                                                              |
| O932 | CAC CAT GCT ATC CAG CCG GTG                                                                                      |
| O933 | GAA TTC ATC AGG GGA AGA GGC TG                                                                                   |
| O934 | CAC CAT GGG AGA AGT CGC CG                                                                                       |
| O935 | GAA TTC ATC ATG AAA GGC CTG TCT G                                                                                |

|      |                                       |
|------|---------------------------------------|
| O936 | CAC CAT GAG ACT TGA TGT GAA CTT C     |
| O937 | GAA TTC ATT AGA TTT TTG TTT CTG GAC C |
